# Supplementary material for: Confirmation of Skywalker Hoolock Gibbon (Hoolock tianxing) in Myanmar Extends Known Geographic Range of an Endangered Primate
Source: Springer Nature journal article supplement (doi:10.1007/s10764-024-00418-6), 2024-02-14
Supplement: MOESM1 [file 10764_2024_418_MOESM1_ESM.pdf]

# APPENDIX I

## INDIVIDUAL QUESTIONNAIRE

---

Date: \_\_\_\_\_ Interviewer(s): \_\_\_\_\_ Village/Town: \_\_\_\_\_

State/Region: \_\_\_\_\_ Coordinates/Point: \_\_\_\_\_

### PLEASE READ TO PARTICIPANT:

The purpose of this study is to better understand your community's interactions with wildlife. Before you decide if you want to participate, we will explain the research study to you. Once you understand what it involves, including the risks and benefits, you can make an informed decision. This is what we call informed consent. Your decision to take part in the study is entirely voluntary. This means that you are free to choose whether or not you want to participate. If you agree to participate in this research, you will be asked to answer a questionnaire. You will be asked questions about primates within and nearby your community. People age 18 and above may participate.

### PRIVACY AND CONFIDENTIALITY

To minimize the risks of breach of confidentiality, we will not collect your name or use your name or any identifying information.

### BENEFITS

You will not benefit directly from your participation in this discussion, but by sharing your experiences, you may help us to discover ways to better protect wildlife and the forest.

### COMPENSATION

We will provide refreshments during the interview. At the end, you will receive a small token of appreciation for your participation. We will not pay you to take part in this study.

### RIGHT TO WITHDRAW FROM THE STUDY

***Participation in this research study is completely voluntary.*** You are free to decline to take part in the project. You can decline to answer any questions and you can stop taking part in the focus group at any time.

### IF YOU HAVE QUESTIONS OR CONCERNS

If you have any questions about this research, please ask them now.

### **If you have questions about this study after we are gone, you may contact:**

Pyae phy Aung, Nature Conservation Society Myanmar: [pyaephyoaung@ncsimm.org](mailto:pyaephyoaung@ncsimm.org)

- 1. Are you willing to participate in this survey? ( ) YES ( ) NO**
- 1a. Have you been interviewed about wildlife before? ( ) YES ( ) NO, *go to Section 2.*
- i. Who came to speak with you? \_\_\_\_\_
-

ii. What did they speak to you about? \_\_\_\_\_

**2. PERSONAL INFORMATION**

- 2a. Age: \_\_\_\_\_
- 2b. Ethnicity: \_\_\_\_\_
- 2c. Religion: \_\_\_\_\_
- 2d. Gender: ( ) MALE ( ) FEMALE ( ) OTHER: \_\_\_\_\_
- 2e. Highest level of education? ( ) NONE ( ) PRIMARY ( ) SECONDARY ( ) HIGH  
( ) COLLEGE ( ) UNDERGRAD ( ) POSTGRAD ( ) OTHER: \_\_\_\_\_

**3. LIVELIHOOD AND FOREST ACTIVITIES**

- 3a. Primary occupation? \_\_\_\_\_
- 3b. Are you retired? ( ) YES ( ) NO
- 3c. What is your annual household income? \_\_\_\_\_
- 3d. How often do you visit the forest? \_\_\_\_\_
- 3e. Do you visit the forest ( ) more or ( ) less than you did 5 years ago?
- 3f. Why do you visit the forest? ( ) HUNTING ( ) LEISURE ( ) AGRICULTURE  
( ) COLLECTING PRODUCTS ( ) OTHER: \_\_\_\_\_
- 3g. How many people around your village hunt? ( ) NONE ( ) FEW ( ) HALF ( ) MOST  
( ) NEARLY ALL ( ) ALL ( ) DON'T KNOW
- 3h. Do you hunt?  
( ) NO, BUT I USED TO.  
( ) YES, go to 3j.  
( ) NEVER, go to Section 4.  
( ) NO COMMENT, go to Section 4.
- 3i. When did you last hunt? ( ) <1 year ( ) 1-5 years ( ) 5-10 years ( ) 10+ years
- 3j. How long were/have you been a hunter? ( ) <5 years ( ) 5-10 years ( ) 10+ years
- 3k. What are/were your main reasons for hunting? ( ) INCOME ( ) SUBSISTENCE  
( ) OTHER: \_\_\_\_\_
- 3l. Do/did you hunt all year round? ( ) YES ( ) NO, PLEASE GIVE DETAILS: \_\_\_\_\_
- 3m. How often do/did you hunt? \_\_\_\_\_
- 3n. Where do/did you hunt? *Indicate on map.* ( ) AROUND VILLAGE, EST. DIST. (Km): \_\_\_\_\_  
( ) NON-LOCAL FOREST, EST DIST. (Km) & DETAILS: \_\_\_\_\_ ( ) OTHER: \_\_\_\_\_
- 3o. How many hours on average do/did you hunt during one trip? ( ) <5 ( ) 5-12 ( ) 13-24 ( ) >24
- 3p. What kind of weapon do/did you use for hunting? *Tick all that apply.*  
( ) GUNS ( ) DOGS ( ) TRAP ( ) CROSSBOW ( ) SNARES ( ) OTHER: \_\_\_\_\_
- 3q. What species are/were your main target (*list all mentioned*)? \_\_\_\_\_
- 3r. Have you ever sold the meat or any part of the animal you hunted? ( ) YES ( ) NO ( ) DON'T KNOW

| NAME OF SPECIES | WILDLIFE PART (e.g. skin/fur, brain, whole animal etc.) | USE OF WILDLIFE (e.g. medicinal, [be specific] food, etc.) | PRICE (KYATS) | SOLD TO WHOM (e.g. Local neighbour, middleman etc.) | SOLD TO WHERE (Village, Township, State) |
|-----------------|---------------------------------------------------------|------------------------------------------------------------|---------------|-----------------------------------------------------|------------------------------------------|
|                 |                                                         |                                                            |               |                                                     |                                          |
|                 |                                                         |                                                            |               |                                                     |                                          |

**4. GIBBON KNOWLEDGE**

- 4a. Can you identify this animal? *Show photo of Skywalker gibbon.* ( ) YES ( ) NO  
i. If YES, what is it called? *Please list all names.* \_\_\_\_\_  
ii. Does it have a tail? ( ) YES ( ) NO ( ) DON'T KNOW
- 4b. Can you identify this animal? *Play Skywalker vocalisation.* ( ) YES ( ) NO  
i. If YES, what is it called? *Please list all names.* \_\_\_\_\_
- 4c. How do you know about it? *Tick all that apply.*  
( ) SEEN IN ZOO  
( ) SEEN IN WILD: WHERE AND WHEN WAS THE LAST TIME? \_\_\_\_\_, \_\_\_\_\_  
( ) SEEN ON TV  
( ) SEEN IN A BOOK  
( ) AWARENESS INTIATIVE: WHICH? \_\_\_\_\_  
( ) HEARD IN WILD: WHERE AND WHEN WAS THE LAST TIME? \_\_\_\_\_, \_\_\_\_\_  
( ) SOMEONE TOLD ME ABOUT IT: WHO? \_\_\_\_\_  
( ) DON'T KNOW  
( ) OTHER: \_\_\_\_\_
- 4d. Have you ever heard of people hunting gibbons? ( ) YES ( ) NO ( ) DON'T KNOW  
i. If YES, when did they last hunt gibbons? \_\_\_\_\_  
ii. If YES, why do they hunt gibbons? \_\_\_\_\_  
iii. If YES, where? \_\_\_\_\_
- 4e. Have you ever heard of people hunting other primate species? ( ) YES ( ) NO ( ) DON'T KNOW  
i. If YES, what species? \_\_\_\_\_  
ii. If YES, when did they last hunt other primates? \_\_\_\_\_  
iii. If YES, why do they hunt other primates? \_\_\_\_\_
- 4f. Are there any local taboos against hunting gibbons? ( ) YES ( ) NO ( ) DON'T KNOW  
i. If YES, what are they? \_\_\_\_\_
- 4g. Do you know any stories, myths or legends about gibbons? If so, can we hear one?  
\_\_\_\_\_  
\_\_\_\_\_
- 4h. Do you think gibbon numbers are: ( ) INCREASING ( ) STABLE ( ) DECREASING ( ) EXTINCT  
( ) DON'T KNOW  
i. Can you please explain your response? \_\_\_\_\_  
ii. If applicable, when did this change happen? \_\_\_\_\_
- 4i. Are gibbons protected? ( ) YES ( ) NO ( ) DON'T KNOW  
i. If YES, what is their protected status in Myanmar? \_\_\_\_\_  
ii. If an animal is protected, what does that mean? \_\_\_\_\_
- 4j. Do you think it is important to protect gibbons? ( ) YES ( ) NO ( ) DON'T KNOW  
iii. Can you please explain your response? \_\_\_\_\_
- 4k. What are the main threats to gibbons? \_\_\_\_\_

**5. PROTECTED AREAS (PA) AND CONSERVATION KNOWLEDGE**

- 5a. What does "nature conservation" mean to you? \_\_\_\_\_
- 5b. What does "extinction" mean to you? \_\_\_\_\_
- 5c. Are there PAs (national parks, reserve forest, wildlife sanctuaries) close to where you live?  
( ) YES ( ) NO ( ) DON'T KNOW

- i. If YES, what are the PAs called? \_\_\_\_\_
- 5d. Do you think PAs are important? ( ) YES ( ) NO ( ) DON'T KNOW  
 i. Why? \_\_\_\_\_
- 5e. Do you know where the boundary of the PA is? ( ) YES ( ) NO  
 i. Please describe and/or indicate on the map? \_\_\_\_\_
- 5f. Do you know why the PA was established? *Tick all that apply.* ( ) PROTECT ANIMALS  
 ( ) PROTECT TREES/VEGETATION ( ) HUMAN LEISURE ( ) OTHER: \_\_\_\_\_
- 5g. Since the PA was established, has it led to changes in the following? *Tick all that apply.*  
 ( ) YOUR INCOME ( ) YOUR LIVELIHOOD ( ) AMOUNT OF TIME YOU SPEND IN FOREST  
 ( ) YOUR FOREST ACTIVITIES ( ) WHERE YOU GO IN FOREST ( ) NO CHANGE  
 ( ) OTHER: \_\_\_\_\_  
 i. Can you elaborate on these changes? \_\_\_\_\_
- 5h. When the PA was established, did it include part of your land? ( ) YES ( ) NO ( ) DON'T KNOW
- 5i. Were you offered any form of compensation/benefits? ( ) YES ( ) NO ( ) DON'T KNOW  
 i. If YES, what compensation/benefits were you offered? \_\_\_\_\_
- 5j. Do you know of any regulations laid down by the PA? *Tick all the interviewee says.*  
 ( ) NO LOGGING ( ) NO GATHERING FUEL WOOD ( ) NO SLASH-AND-BURN  
 ( ) NO GRAZING ( ) NO HUNTING ( ) NO PRODUCT COLLECTION  
 ( ) OTHER: \_\_\_\_\_
- 5k. Were you/your community ever involved in decisions about the park? ( ) YES ( ) NO ( ) DON'T KNOW
- 5l. Would you like to be involved in decisions? ( ) YES ( ) NO ( ) DON'T KNOW
- 6. FOREST COVER CHANGE AND HABITAT QUALITY**
- 6a. Do you think forest cover is: ( ) INCREASING ( ) DECREASING ( ) UNCHANGED ( ) DON'T KNOW
- 6b. Do you know the causes of forest change? ( ) YES ( ) NO  
 i. If YES, what are they? \_\_\_\_\_

**Thank you for your participation.**

## APPENDIX II FIELD ASSESSMENT CHECKLIST

Tourism active in forest area (e.g. are individual tourists or group tours present? Is there evidence of tourism in the area, i.e. hotels, tourist sites etc.?) Specify \_\_\_\_\_.

Recreation site in forest area (e.g. recreational hunting, hiking etc.) Specify \_\_\_\_\_.

Industry present within 5 km of forest area (e.g. mining, logging, roadworks etc.). Specify \_\_\_\_\_.

Recent visible logging. Specify location \_\_\_\_\_.

Open markets with animals or animal parts or products for sale. Specify location \_\_\_\_\_.

| Species Available for Sale | Quantity Available | Cost \$ |
|----------------------------|--------------------|---------|
|                            |                    |         |
|                            |                    |         |
|                            |                    |         |
|                            |                    |         |

Concealed markets with animals or animal parts or products for sale. Specify location \_\_\_\_\_.

| Species Available for Sale | Quantity Available | Cost \$ |
|----------------------------|--------------------|---------|
|                            |                    |         |
|                            |                    |         |
|                            |                    |         |
|                            |                    |         |

Individuals selling animals or animal parts or products. Species location \_\_\_\_\_.

| Species Available for Sale | Quantity Available | Cost \$ |
|----------------------------|--------------------|---------|
|                            |                    |         |
|                            |                    |         |
|                            |                    |         |
|                            |                    |         |

Temporary venues (e.g. festivals, mobile markets, special events) with animals or animal parts or products for sale. Species location \_\_\_\_\_.

| Species Available for Sale | Quantity Available | Cost \$ |
|----------------------------|--------------------|---------|
|                            |                    |         |
|                            |                    |         |
|                            |                    |         |
|                            |                    |         |
